# Supplementary material
Source: Springer Nature journal article supplement (https://www.springermedizin.de/resource/supplementary/13030_2010_76_MOESM3_ESM.pdf/9644682)

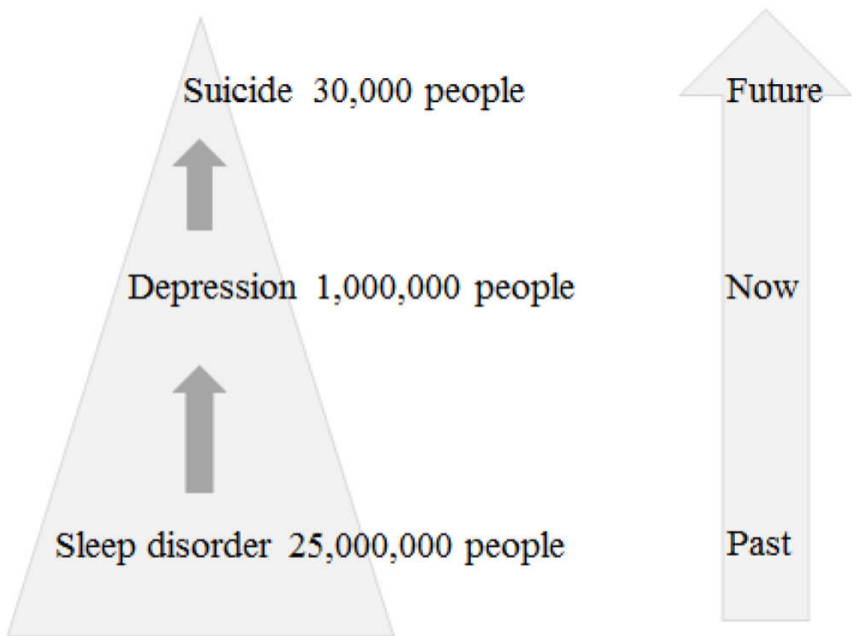

Supplement: MOESM3 [file 9644682]
